# Supplementary material
Source: Springer Nature journal article supplement (https://www.springermedizin.de/resource/supplementary/12889_2010_2894_MOESM7_ESM.pdf/9487592)

Men

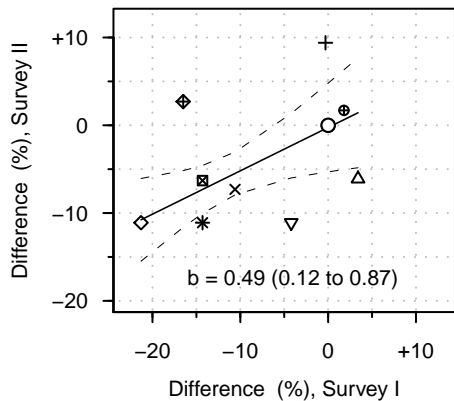

Women

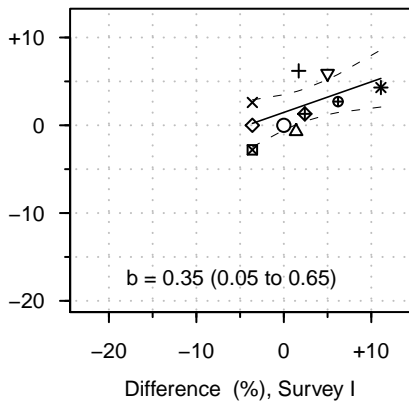

- Med
- △ Bio-Geo
- + Phil
- × Phys-Che
- ◇ Sports
- ▽ Econ
- ▣ Math
- \* Law
- ◆ Lib
- ⊙ Admin

Survey I

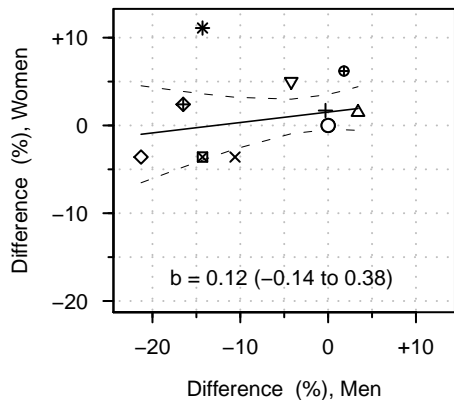

Survey II

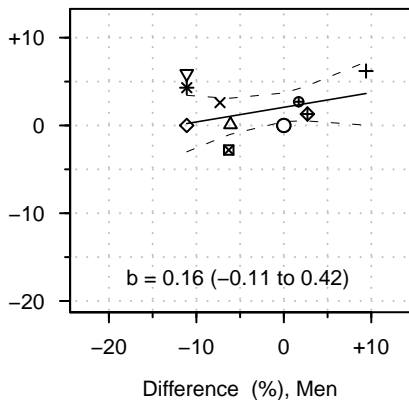

Supplement: MOESM7 [file 9487592]
